# Supplementary material for: Switchable silver mirrors with long memory effects
Source: PubMed Central journal article supplement — Chem Sci. 2014 Sep 29;6(1):596–602. doi: 10.1039/c4sc01912a (PMC5588729; doi:10.1039/c4sc01912a), 2014-09-29
Supplement: SC-006-C4SC01912A-s001.pdf [file SC-006-C4SC01912A-s001.pdf]

## Supporting Information

### Switchable Silver Mirrors with Long Memory

Chihyun Park, Seogjae Seo, Haijin Shin, Bhimrao D. Sarwade, Jongbeom Na, and Eunkyong Kim\*

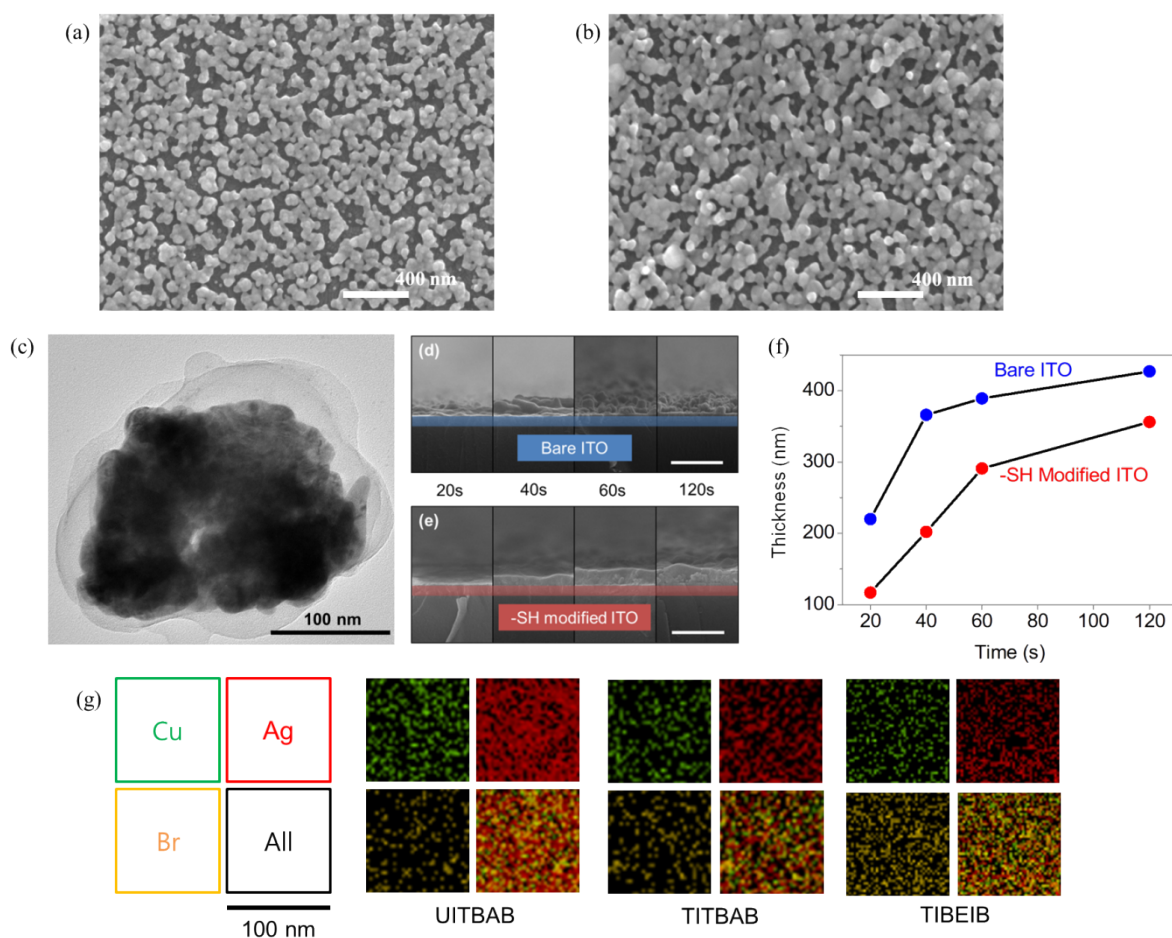

**Fig S1.** SEM images of Ag deposited electrodes (a) without Cu, and (b) with Cu content (Ag was deposited by applying -2.5V potential for 1min on UI electrode). (c) TEM image of the particle detached from the metallic layer of UITBAB. SEM images of the electrodeposited metallic films: The cross-sectional images of the metallic films of (d) UITBAB and (e) TITBAB grown under the application of -2.5 V for 20~120 s. Scale bars, 1 μm. (f) Thickness of the electrodeposited metallic films grown under the application of -2.5 V for 20 ~120 s. (g) EDS images corresponding to Ag, Cu, and Br atom maps for UITBAB, TITBAB, and TIBEIB, respectively.

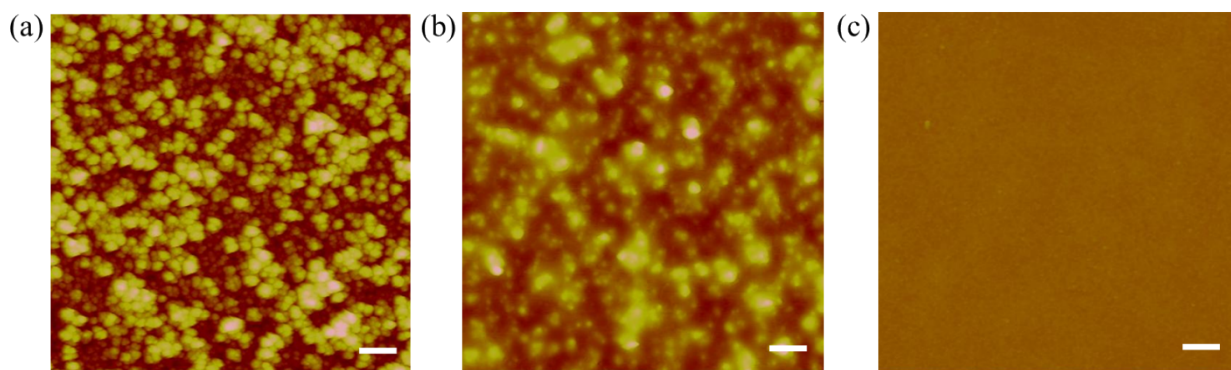

**Fig S2.** AFM images of the metallic films from (a) UITBAB (Roughness 66nm), (b) TITBAB (Roughness 37nm), and (c) TIBEIB (Roughness 2.7nm). Scale bars 1 $\mu$ m.

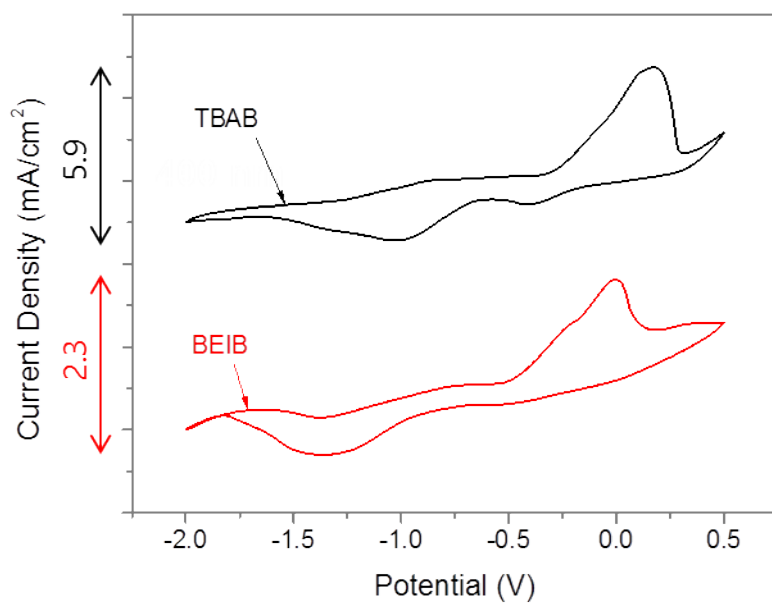

**Fig S3.** Cyclic voltammograms of TBAB (0.5 mM AgNO<sub>3</sub>, 2.5 mM TBABr, 0.1 mM CuCl<sub>2</sub> in DMSO 10 ml with 10wt% of PVB), and BEIB (45.0 mM BEIBr, 0.5 mM AgNO<sub>3</sub>, 0.1 mM CuCl<sub>2</sub> with 10wt% of DMSO) at a scan rate of 100mVs<sup>-1</sup> with a 1mm diameter Pt disk as the working electrode and Ag/AgCl as the reference electrode.

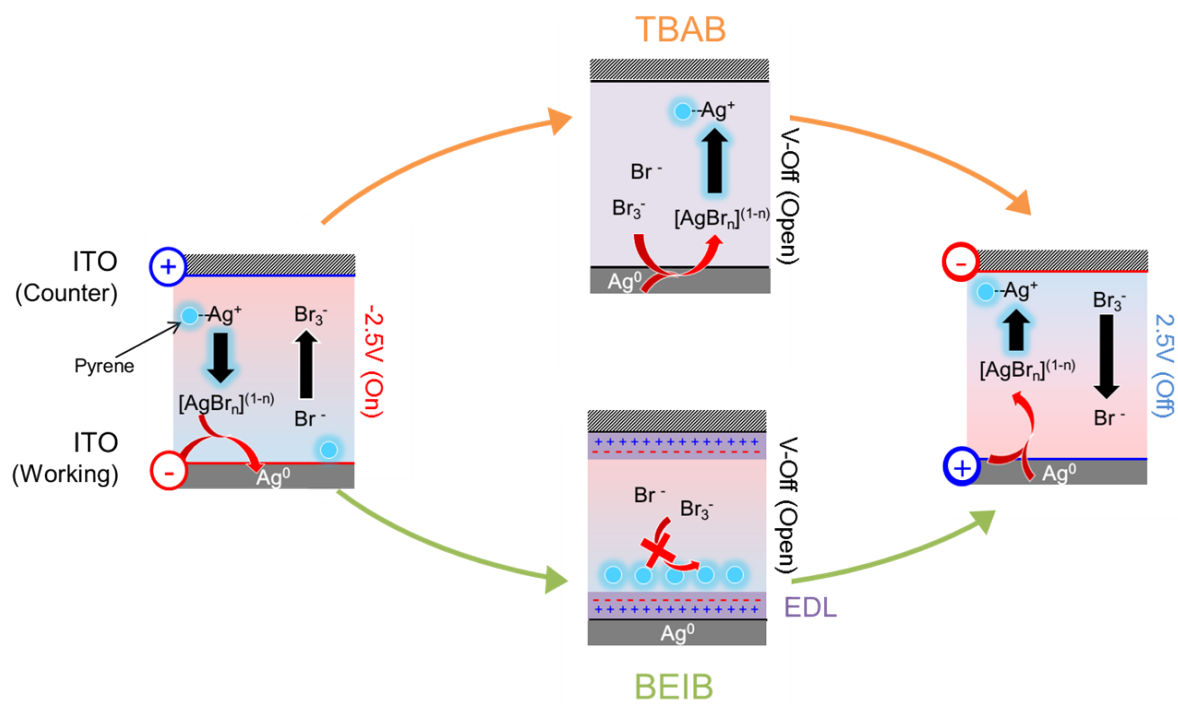

**Fig S4.** Schematic diagram of Ion transport of TBAB and BEIB, which was elucidated by pyrene as a fluorophore for reflective, V-off and transparent states.

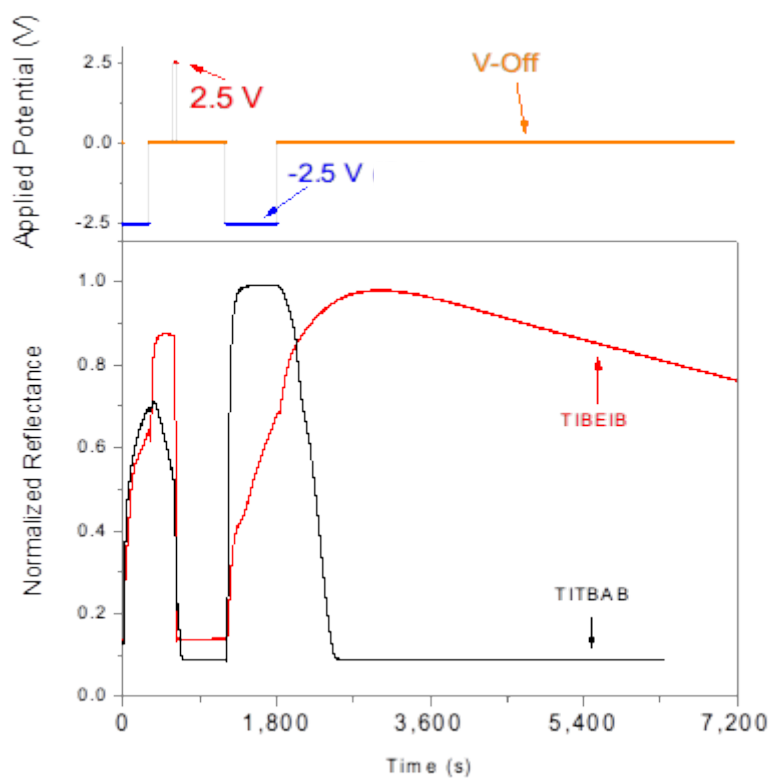

**Fig S5.** The normalized reflectance of TIBEIB and TITBAB recorded at 650 nm. The normalized reflectance was determined by dividing the reflectance by the maximum reflectance.

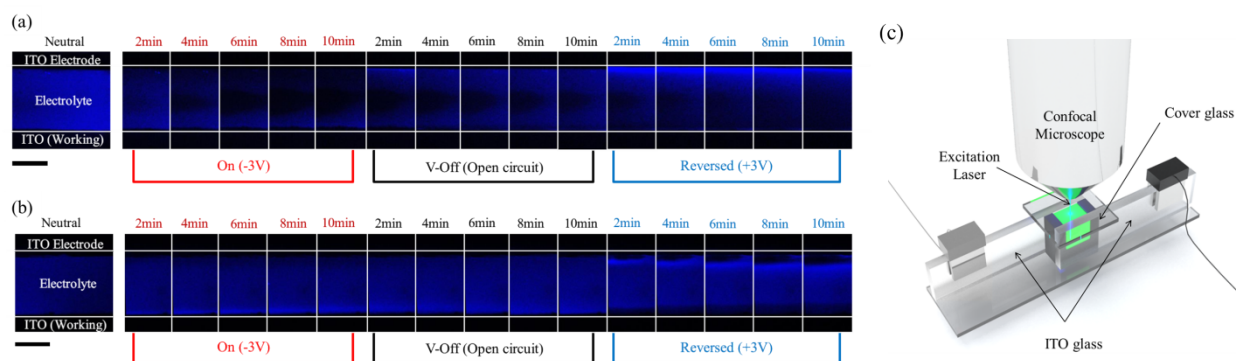

**Fig S6.** Confocal microscopic fluorescence images of (a) TBAB and (b) BEIB were recorded every 2min. (c) Schematic diagram on the cross-cut measurement for the confocal microscope using a switchable mirror, consisted of two ITO electrode and electrolyte.

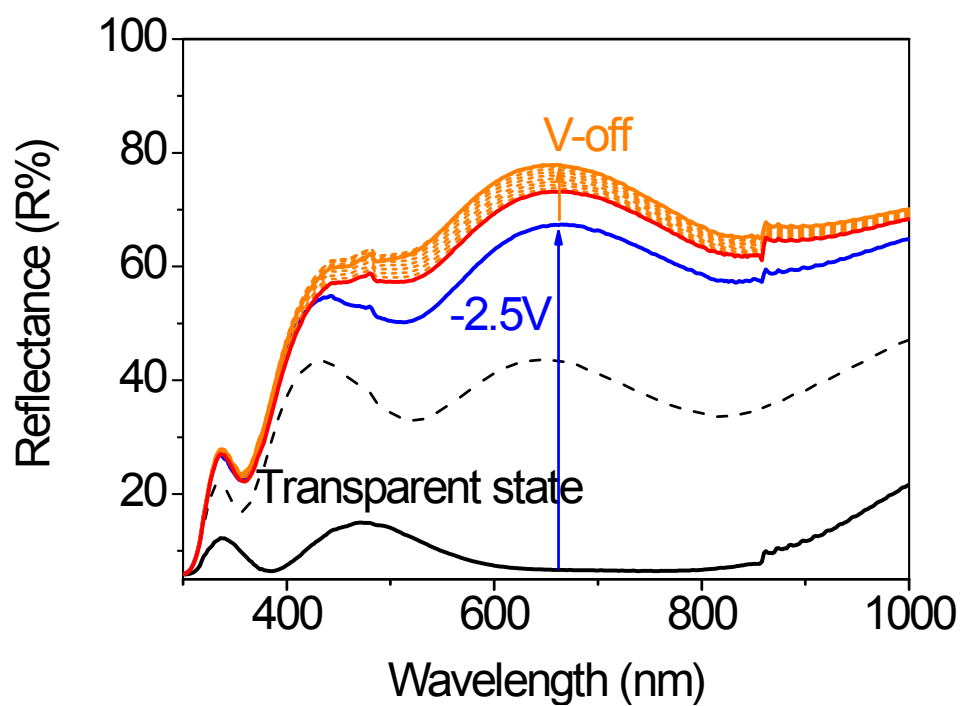

**Fig S7.** Reflectance spectra of TIBEIB at different states: From initial transparent state (solid black), 5min after application of -2.5V after (dashed black) to 10min (blue), V-Off state for 15 min (orange), and 60min (Red). Reflectance spectra measured every 5min while V-Off state are plotted as dashed orange lines.

**Table S1.** At% and molar ratio of Ag:Cu of electrodeposited mirror layer from EDS

|    | <b>UITBAB [At%]</b> | <b>TITBAB [At%]</b> | <b>TIBEIB [At%]</b> |
|----|---------------------|---------------------|---------------------|
| Ag | 40.2                | 11.9                | 6.6                 |
| Cu | 12.9                | 3.9                 | 2.1                 |
| Br | 0.6                 | 0.7                 | 0.8                 |
| S  | 1.3                 | 8.7                 | 8.4                 |
| O  | 45.0                | 74.8                | 82.1                |
| N  | 0.0                 | 0.0                 | 0.0                 |

  

|       | <b>UITBAB</b> | <b>TITBAB</b> | <b>TIBEIB</b> |
|-------|---------------|---------------|---------------|
| Ag/Cu | 3.1           | 3.1           | 3.1           |



**Table S2.** Switching properties of the electrochemical mirrors.

|                    | Composition                                                    | Working Electrode | $R_0$ [%]*  | $R_{0.5}$ [%] | $R_1$ [%] | $R_3$ [%]   | $R_5$ [%] | $R_{10}$ [%] | $R_{30}$ [%] |
|--------------------|----------------------------------------------------------------|-------------------|-------------|---------------|-----------|-------------|-----------|--------------|--------------|
| 1<br><b>UITBAB</b> | AgNO <sub>3</sub> , TBABr,<br>CuCl <sub>2</sub> , PVB,<br>DMSO | -                 | <b>49.6</b> | 45.0          | 37.9      | 17.5        | 11.5      | 9.0          | -            |
| 2<br><b>TITBAB</b> | AgNO <sub>3</sub> , TBABr,<br>CuCl <sub>2</sub> , PVB,<br>DMSO | -SH               | <b>84.5</b> | 83.8          | 82.6      | 37.2        | 27.5      | 9.4          | -            |
| 3<br><b>TIMHIB</b> | AgNO <sub>3</sub> , CuCl <sub>2</sub> ,<br>MHIBr, DMSO         | -SH               | 61.8        | 61.5          | 60.9      | 67.3        | 74.3      | 80.14        | <b>81.5</b>  |
| 4<br><b>TIBEIB</b> | AgNO <sub>3</sub> , CuCl <sub>2</sub> ,<br>BEIBr, DMSO         | -SH               | 87.0        | 88.2          | 88.9      | <b>89.3</b> | 89.2      | 88.5         | 85           |
| 5<br><b>TIBHIB</b> | AgNO <sub>3</sub> , CuCl <sub>2</sub> ,<br>BHIBr, DMSO         | -SH               | 41.3        | 40.9          | 40.9      | 40.3        | 40.6      | 42.4         | <b>44.9</b>  |

\*  $R_n$  represents the reflectance of 650nm at  $n$  min after switched with -2.5V applied for 30min. Thus  $R_0$  means the reflectance at right after the switching process finished, and  $R_{0.5}$ ,  $R_1$ ,  $R_3$ ,  $R_5$ ,  $R_{10}$ ,  $R_{30}$  means the reflectance at 30s, 1min, 3min, 5min, 10min, 30min after electricity off, respectively. The highest reflectance value for each compositions are bolded.

**Movie S1.** Electrochemical stability of the TITBAB

**Movie S2.** Bistability of the TIBEIB

**Movie S3.** Reversible switching of TIBEIB

**Movie S4.** *In-situ* confocal microscopic movie of TITBAB

**Movie S5.** *In-situ* confocal microscopic movie of TIBEIB
